# Supplementary material for: Phosphomolybdic acid supported single-metal-atom catalysis in CO oxidation: first-principles calculations
Source: Royal Society of Chemistry journal article supplement (doi:10.1039/c8cp03916j), 2018-01-01
Supplement: c8cp03916j1.pdf [file c8cp03916j1.pdf]

## Supporting Information

### **Phosphomolybdic Acid Supported Single-Metal-Atom Catalysis in CO Oxidation:**

#### **First-Principles Calculations**

*Ming'an Yu, Yingxin Feng, Liye Gao and Sen Lin\**

*State Key Laboratory of Photocatalysis on Energy and Environment, College of*

*Chemistry, Fuzhou University, Fuzhou 350002, China*

*\*Corresponding author. Email: [slin@fzu.edu.cn](mailto:slin@fzu.edu.cn)*

**Table S1** Structure parameters for the reaction intermediates of CO oxidation following LH mechanism on *M*-PMAs (*M*=Pt, Fe, Ir, Rh and Ru).

|                | Pt-PMA     | Fe-PMA     | Ir-PMA     | Rh-PMA     | Ru-PMA     |
|----------------|------------|------------|------------|------------|------------|
| State ii       |            |            |            |            |            |
| $d_{O-O}$ (Å)  | 1.27       | 1.27       | 1.28       | 1.26       | 1.26       |
| $d_{M-O}$ (Å)  | 2.10, 2.88 | 1.86, 2.80 | 1.93, 2.84 | 1.93, 2.82 | 1.91, 2.98 |
| State iii      |            |            |            |            |            |
| $d_{M-C}$ (Å)  | 1.91       | 2.00       | 3.07       | 2.07       | 2.07       |
| $d_{C-O}$ (Å)  | 1.69       | 1.15       | 0.98       | 1.16       | 1.16       |
| $d_{O-O}$ (Å)  | 1.37       | 1.34       | 2.06       | 1.36       | 1.36       |
| $E_{b-O}$ (eV) | 0.12       | -0.87      | -1.41      | -0.65      | -2.78      |
| State v        |            |            |            |            |            |
| $d_{C-O}$ (Å)  | 1.14       | 1.16       | 1.15       | 1.14       | 1.14       |
| State vi       |            |            |            |            |            |
| $d_{M-C}$ (Å)  | 2.29       | 2.43       | 3.27       | 1.96       | 1.84       |

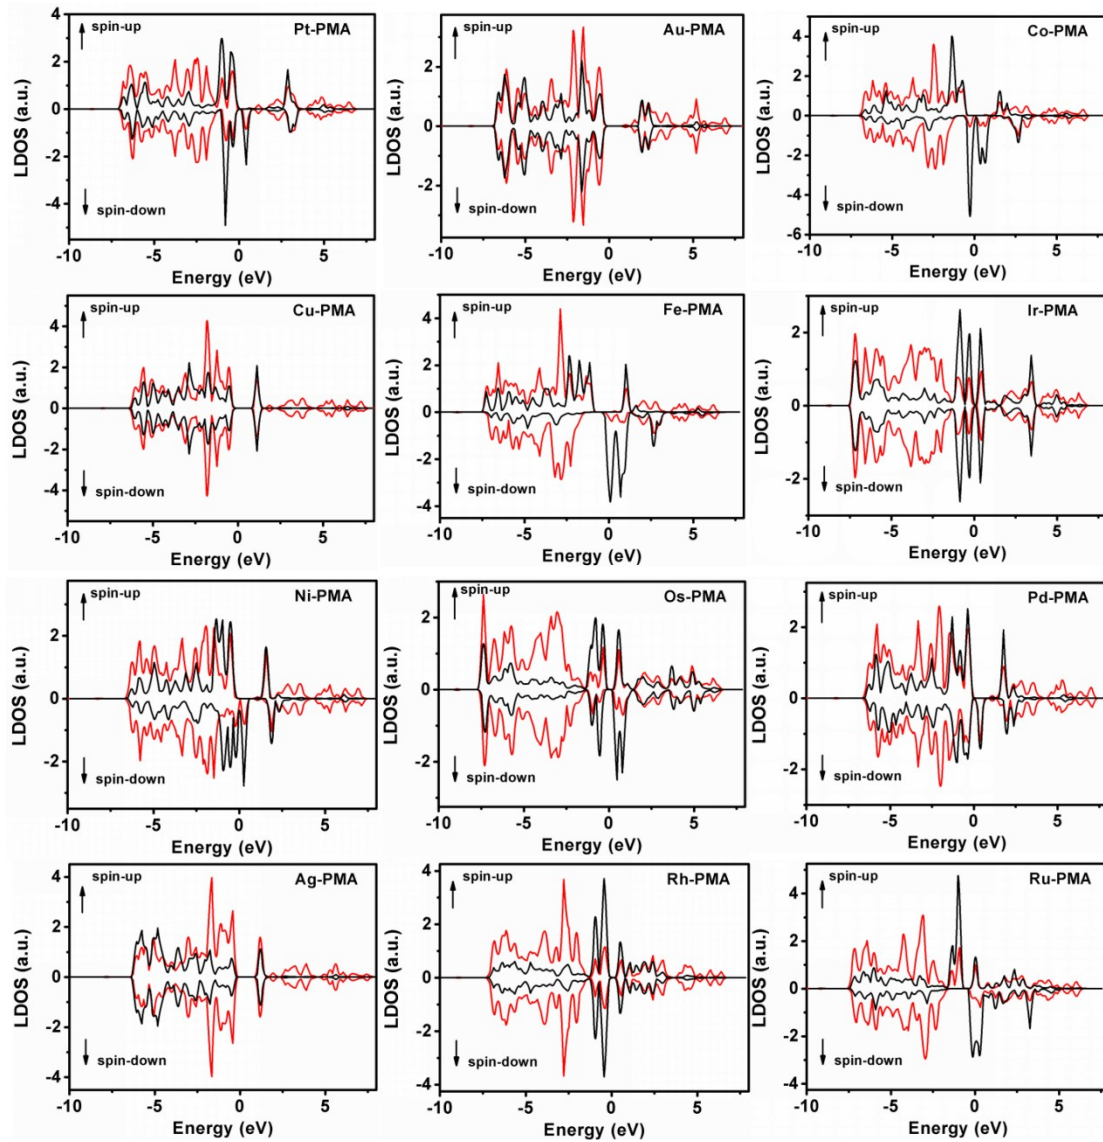

**Fig. S1** Corresponding spin-polarized LDOSs of  $M$ -3d and neighboring O-2p orbitals of  $M$ -PMA ( $M = \text{Pt, Au, Co, Fe, Ir, Ni, Pd, Ag, Rh, Cu, Os}$  and  $\text{Ru}$ ). Black and red curves denote  $d$  orbitals of metal and  $p$  orbitals of O, respectively. Fermi level is set to 0 eV.

**Table S2** Calculated M-O -distances ( $d/\text{\AA}$ ) and  $\angle OMO$  ( $^\circ$ ) for  $M$  at the anchoring sites of the  $M$ -PMA, CO- $M$ -PMA and  $O_2$ - $M$ -PMA systems.

| $M$ | $d_{M-O}$ ( $\text{\AA}$ ) | $d_{M-O}$ (CO)         | $d_{M-O}$ ( $O_2$ )    | $\angle OMO$           | $\angle OMO$ (CO)      | $\angle OMO$ ( $O_2$ ) |
|-----|----------------------------|------------------------|------------------------|------------------------|------------------------|------------------------|
| Pt  | 1.94, 1.94, 2.04, 2.04     | 1.98, 2.16, 2.10, 2.08 | 2.00, 2.00, 2.04, 2.10 | 87.3, 87.5, 87.5, 87.4 | 78.6, 78.1, 77.5, 78.2 | 76.4, 76.8, 77.4, 76.9 |
|     | 2.00, 2.00, 2.02, 2.02     | 2.00, 2.08, 2.16, 2.10 | 1.98, 1.95, 2.04, 2.04 | 88.2, 88.2, 88.2, 88.2 | 78.1, 78.6, 77.5, 78.2 | 86.0, 85.8, 86.0, 86.1 |
| Au  | 1.81, 1.81, 1.83, 1.83     | 1.83, 1.83, 1.89, 1.88 | 1.81, 1.81, 1.93, 1.93 | 87.9, 87.9, 87.9, 87.9 | 87.4, 87.4, 87.1, 87.1 | 84.2, 84.2, 84.3, 84.3 |
|     | 1.82, 1.82, 1.84, 1.84     | 1.84, 1.84, 1.85, 1.86 | 1.81, 1.82, 1.82, 1.83 | 89.3, 89.3, 89.3, 89.3 | 88.3, 87.8, 88.1, 88.3 | 89.7, 89.5, 89.8, 90.0 |
| Cu  | 1.81, 1.81, 1.81, 1.82     | 1.81, 1.82, 1.84, 1.84 | 1.88, 1.88, 1.91, 1.91 | 88.6, 88.6, 88.6, 88.6 | 88.3, 88.3, 88.4, 88.3 | 82.0, 82.0, 81.8, 81.8 |
|     | 1.86, 1.85, 2.06, 2.04     | 1.95, 1.98, 2.07, 2.08 | 2.00, 2.00, 2.03, 2.00 | 80.1, 85.3, 85.3, 80.2 | 81.1, 80.6, 78.8, 79.2 | 78.7, 78.8, 78.7, 78.6 |
| Ir  | 1.78, 1.78, 1.87, 1.87     | 1.86, 1.86, 1.89, 1.89 | 1.77, 1.77, 1.88, 1.88 | 88.6, 88.6, 88.6, 88.6 | 86.3, 86.4, 86.2, 86.5 | 89.7, 89.6, 89.5, 89.6 |
|     | 1.88, 1.86, 1.96, 2.01     | 2.08, 2.08, 2.11, 2.08 | 1.87, 1.88, 2.03, 2.04 | 79.5, 82.2, 82.2, 78.8 | 87.0, 91.1, 90.8, 87.6 | 81.0, 80.7, 81.2, 80.6 |
| Os  | 1.94, 1.94, 2.04, 2.04     | 1.95, 2.15, 2.10, 2.11 | 1.97, 1.99, 2.06, 2.07 | 85.7, 85.7, 85.7, 85.7 | 77.4, 77.6, 78.9, 78.8 | 81.9, 81.6, 81.1, 82.5 |
|     | 2.01, 2.01, 2.02, 2.02     | 2.13, 2.16, 2.11, 2.14 | 2.01, 2.01, 2.02, 2.02 | 86.9, 86.9, 86.9, 86.9 | 78.3, 77.7, 77.3, 78.5 | 86.8, 86.8, 86.8, 86.8 |
| Ag  | 1.88, 1.88, 2.08, 2.08     | 1.99, 1.99, 2.03, 2.03 | 1.97, 1.96, 2.05, 2.04 | 82.3, 82.3, 82.3, 82.3 | 85.1, 87.1, 84.8, 87.4 | 79.8, 78.5, 80.0, 80.0 |
|     | 1.90, 1.90, 2.03, 2.03     | 1.97, 2.02, 2.02, 2.02 | 2.00, 2.00, 2.01, 2.03 | 80.8, 82.8, 82.8, 80.9 | 79.2, 78.6, 78.5, 79.3 | 78.6, 78.7, 78.6, 78.7 |
| Rh  | 1.90, 1.90, 2.03, 2.03     | 1.97, 2.02, 2.02, 2.02 | 2.00, 2.00, 2.01, 2.03 | 80.8, 82.8, 82.8, 80.9 | 79.2, 78.6, 78.5, 79.3 | 78.6, 78.7, 78.6, 78.7 |
|     | 2.03, 2.03, 2.02, 2.02     | 2.02, 2.02, 2.01, 2.03 | 2.01, 2.03, 82.8, 80.9 | 78.5, 79.3, 78.5, 79.3 | 78.6, 78.7, 78.6, 78.7 | 78.6, 78.7, 78.6, 78.7 |

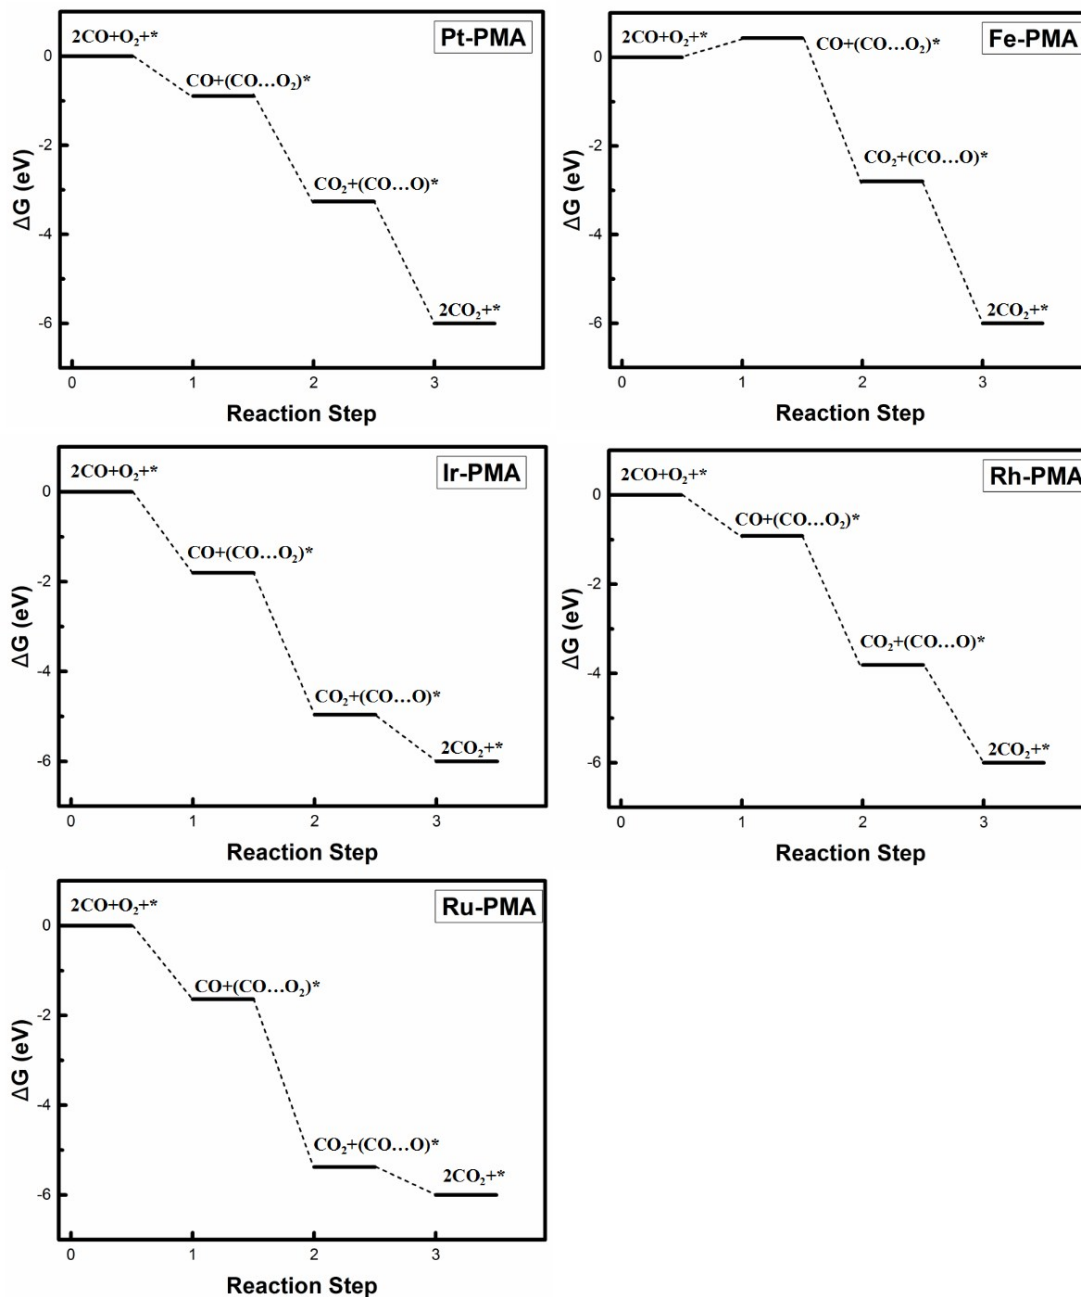

**Fig. S2** Free energy ( $\Delta G$ ) profile with all reaction steps of CO oxidation on M-PMA.  $\Delta G$  is obtained using  $\Delta G = \Delta E - T\Delta S$ , where  $\Delta E$  is the total energy change directly from DFT calculations,  $\Delta S$  denotes the entropy change, and the zero point energies (ZPEs) are assumed to be negligible. The entropies of the adsorbed state are also thought to be negligible while the  $\Delta S$  values of the gases are obtained from the reference (P. Atkins and J. Paula, in Atkins' Physical Chemistry, ed. W. H. Freeman and Company, New York, 2006, pp. 993–1001).
